# Supplementary material for: Sutureless Perceval Aortic Valve Versus Conventional Stented Bioprostheses: Meta‐Analysis of Postoperative and Midterm Results in Isolated Aortic Valve Replacement
Source: PubMed Central journal article supplement — J Am Heart Assoc. 2018 Feb 16;7(4):e006091. doi: 10.1161/JAHA.117.006091 (PMC5850177; doi:10.1161/jaha.117.006091), 2018-02-16
Supplement: JAH3-7-e006091-s001.pdf [file JAH3-7-e006091-s001.pdf]

# **SUPPLEMENTAL MATERIAL**

**Table S1.** List of included studies

| First author  | Year | Institution                           | Study period                  | Type of study | Type of SU | Number SU | Number AVR | Mean follow up SU (years) | Mean follow up AVR (years) |
|---------------|------|---------------------------------------|-------------------------------|---------------|------------|-----------|------------|---------------------------|----------------------------|
| Muneretto[1]  | 2014 | University of Brescia, Italy          | October 2010 to February 2013 | PSM           | Perceval S | 204       | 204        | 1.9±0.6                   | 2±0.8                      |
| Gilmanov[2]   | 2014 | Pasquinucci Hospital, Massa, Italy    | August 2004 to January 2014   | PSM           | Perceval S | 133       | 133        | 1.5±0.6                   | 4.5±1.5                    |
| Dalen[3]      | 2015 | Six European Centers                  | June 2007 to April 2014       | PSM           | Perceval S | 171       | 171        | 2.7±2.1                   | 4.2±1.7                    |
| Santarpino[4] | 2013 | Klinikum Nurnberg, Nuremberg, Germany | March 2010 to December 2011   | POS           | Perceval S | 50        | 50         | none                      | none                       |
| D'Onofrio[5]  | 2012 | Three Italian Centers                 | March 2011 to September 2011  | PSM           | Perceval S | 31        | 112        | none                      | none                       |
| Shrestha[6]   | 2013 | Hannover Medical school, Germany      | April 2007 to December 2012   | RS            | Perceval S | 50        | 70         | 1.8±1.4                   | 2.6±1.3                    |

PSM: propensity score match; POS: prospective observational study, RS: retrospective study

**Figure S1.** Risk of bias summary: review authors' judgements about each risk of bias item for included study.

|                 | Random sequence generation (selection bias) | Allocation concealment (selection bias) | Blinding of participants and personnel (performance bias) | Blinding of outcome assessment (detection bias) | Incomplete outcome data (attrition bias) | Selective reporting (reporting bias) |
|-----------------|---------------------------------------------|-----------------------------------------|-----------------------------------------------------------|-------------------------------------------------|------------------------------------------|--------------------------------------|
| D'onofrio 2012  | ⊖                                           | ⊕                                       | ⊖                                                         | ⊖                                               | ⊖                                        | ⊖                                    |
| Dalen 2015      | ⊖                                           | ⊕                                       | ⊕                                                         | ⊖                                               | ⊖                                        | ⊕                                    |
| Gilmanov 2014   | ⊖                                           | ⊕                                       | ⊕                                                         | ⊕                                               | ⊕                                        | ⊖                                    |
| muneretto 2015  | ⊖                                           | ⊕                                       | ⊕                                                         | ⊖                                               | ⊕                                        | ⊖                                    |
| Santarpino 2013 | ⊖                                           | ⊖                                       | ⊖                                                         | ⊖                                               | ⊕                                        | ⊕                                    |
| Shrestha 2013   | ⊖                                           | ⊖                                       | ⊖                                                         | ⊕                                               | ⊖                                        | ⊖                                    |

**Figure S2.** Funnel plot for the meta analysis of the mortality of Perceval valve compared with conventional prosthesis.

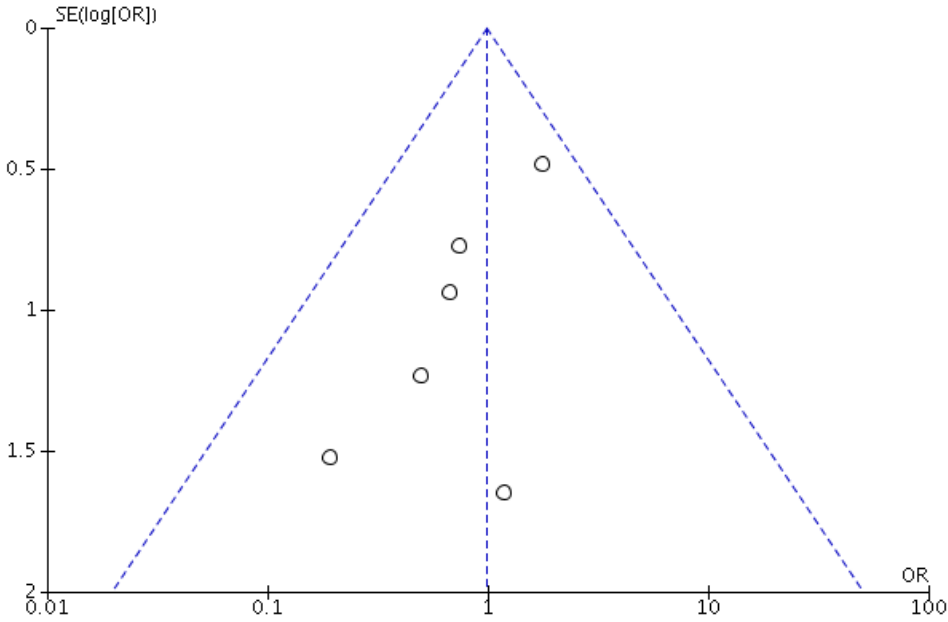

## Supplemental References:

1. Muneretto C, Bisleri G, Moggi A, Di Bacco L, Tespili M, Repossini A, Rambaldini M. Treating the patients in the “grey-zone” with aortic valve disease: a comparison among conventional surgery, sutureless valves and transcatheter aortic valve replacement. *Interact Cardiovasc Thorac Surg*. 2015;20:90–5.
2. Gilmanov D, Miceli A, Ferrarini M, Farneti P, Murzi M, Solinas M, Glauber M. Aortic valve replacement through right anterior minithoracotomy: can sutureless technology improve clinical outcomes? *Ann Thorac Surg*. 2014;98:1585–92.
3. Dalén M, Biancari F, Rubino AS, Santarpino G, Glaser N, De Praetere H, Kasama K, Juvonen T, Deste W, Pollari F, Meuris B, Fischlein T, Mignosa C, Gatti G, Pappalardo A, Svenarud P, Sartipy U. Aortic valve replacement through full sternotomy with a stented bioprosthesis versus minimally invasive sternotomy with a sutureless bioprosthesis. *Eur J Cardiothorac Surg*. 2016;49:220–7.
4. Santarpino G, Pfeiffer S, Concistré G, Grossmann I, Hinzmann M, Fischlein T. The Perceval S aortic valve has the potential of shortening surgical time: does it also result in improved outcome? *Ann Thorac Surg*. 2013;96:77-81-2.
5. D’Onofrio A, Rizzoli G, Messina A, Alfieri O, Lorusso R, Salizzoni S, Glauber M, Bartolomeo R Di, Besola L, Rinaldi M, Troise G, Gerosa G. Conventional surgery, sutureless valves, and transapical aortic valve replacement: what is the best option for patients with aortic valve stenosis? A multicenter, propensity-matched analysis. *J Thorac Cardiovasc Surg*. 2013;146:1065-70-1.
6. Shrestha M, Maeding I, Höffler K, Koigeldiyev N, Marsch G, Siemeni T, Fleissner F, Haverich A. Aortic valve replacement in geriatric patients with small aortic roots: are sutureless valves the future? *Interact Cardiovasc Thorac Surg*. 2013;17:778–82; discussion 782.
